# Supplementary material for: Impaired Hippocampal Glutamate and Glutamine Metabolism in the db/db Mouse Model of Type 2 Diabetes Mellitus
Source: Hindawi journal article supplement (doi:10.1155/2017/2107084), 2017-01-01
Supplement: f1 [file 2107084.f1.pdf]

# Supplementary material – Andersen et al. 2017 – Neural Plast.

**A**

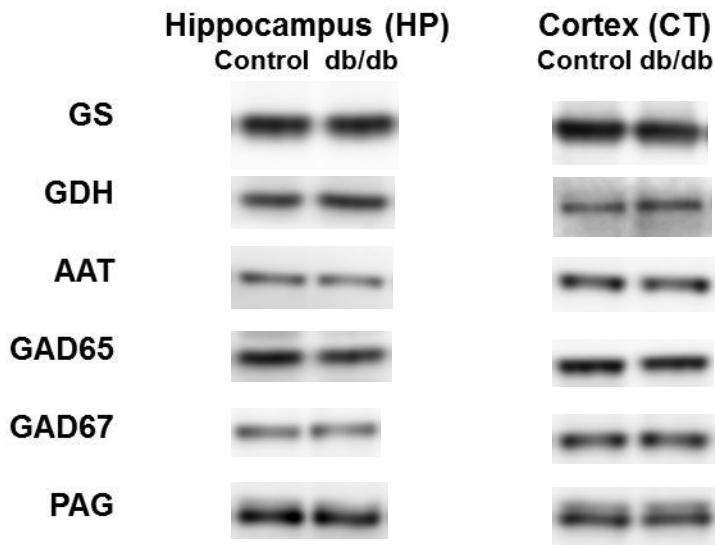

**B**

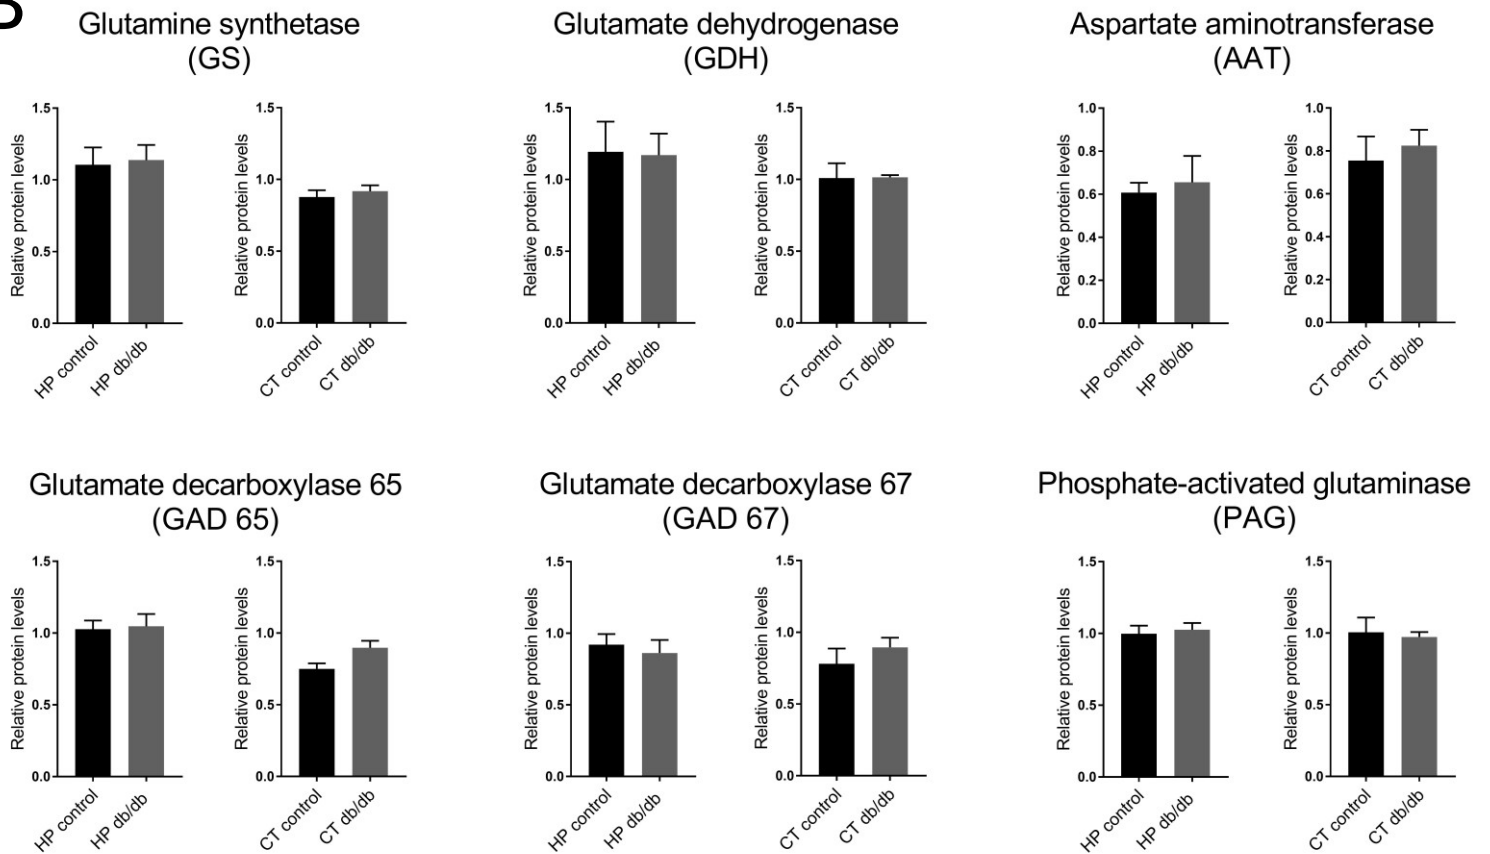

## Supplementary figure 1

**A:** Representative Western blots of hippocampal (HP) and cerebral cortical (CT) homogenate from control and db/db mice. GS: glutamine synthetase, GDH: glutamate dehydrogenase, AAT: aspartate aminotransferase, GAD: glutamate decarboxylase, PAG: phosphate activated glutamine.

**B:** Semi-quantitative assessment of expression of proteins important for the glutamate-glutamine cycle. Western blots of hippocampal (HP) and cerebral cortical (CT) homogenate of control and db/db mice. Results are presented as mean  $\pm$  SEM, n = 4 obtained from individual animals. Statistically significant differences were tested employing Student's t-test, p < 0.05.
